# Supplementary material for: Two new 3-D boratopolyoxovanadate architectures based on the [V12B16O50(OH)8]12− cluster with different metal linkers
Source: Royal Society of Chemistry journal article supplement (doi:10.1039/c3nj00793f), 2013-01-01
Supplement: c3nj00793f.pdf [file c3nj00793f.pdf]

Supporting Information for

**Two new 3-D boratopolyoxovanadate architectures based on  $[V_{12}B_{16}O_{50}(OH)_8]^{12-}$   
cluster with different metal linkers**

Jian Zhou,\* Xing Liu, Hong-Ping Xiao, Chunyang Kong, Huahong Zou, Qiuling Tang, and  
Jianhui Li

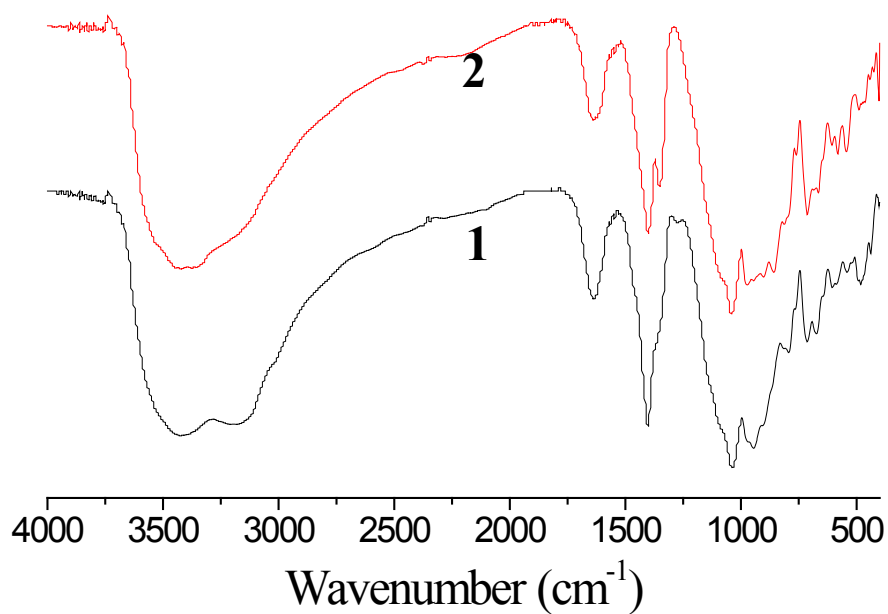

Fig. S1 IR spectra of **1-2**.

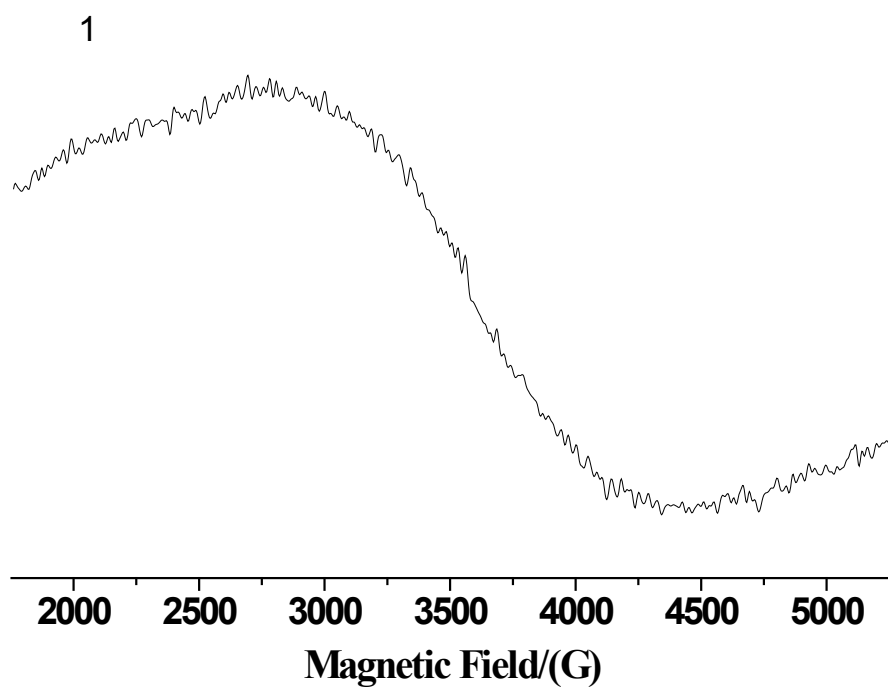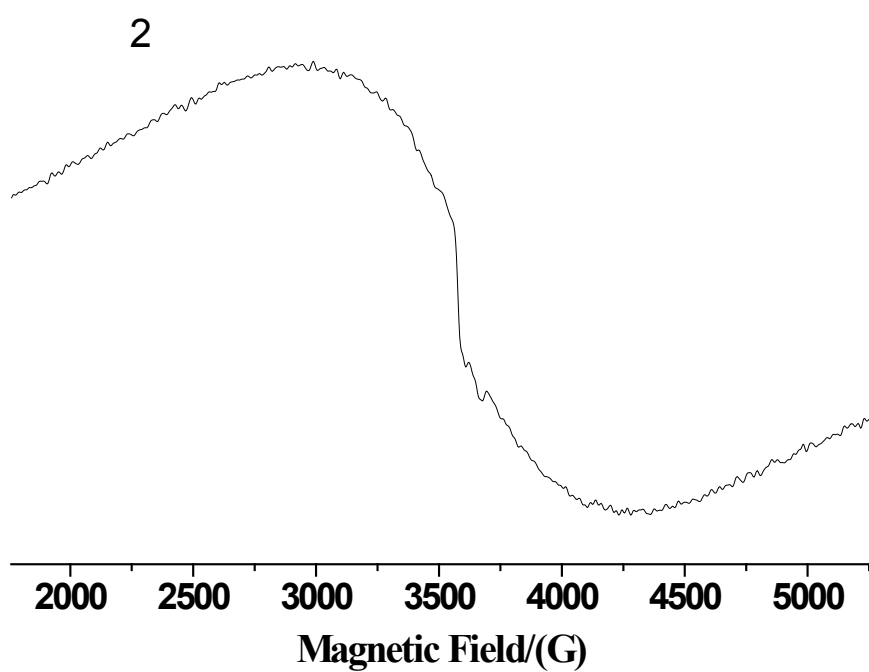

Fig. S2. EPR spectra of compounds **1** and **2**.

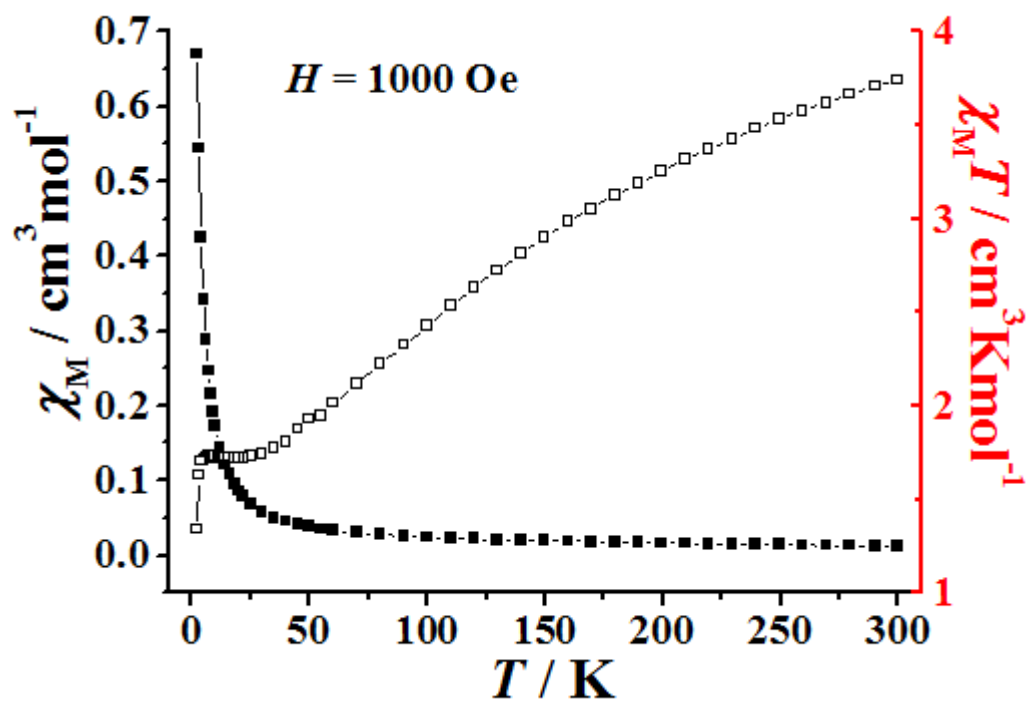

Fig. S3 The temperature dependence of the molar magnetic susceptibility  $\chi_M$  (■) and the product of the molar magnetic susceptibility and temperature  $\chi_M T$  (□) for **2** between 2 and 300 K.

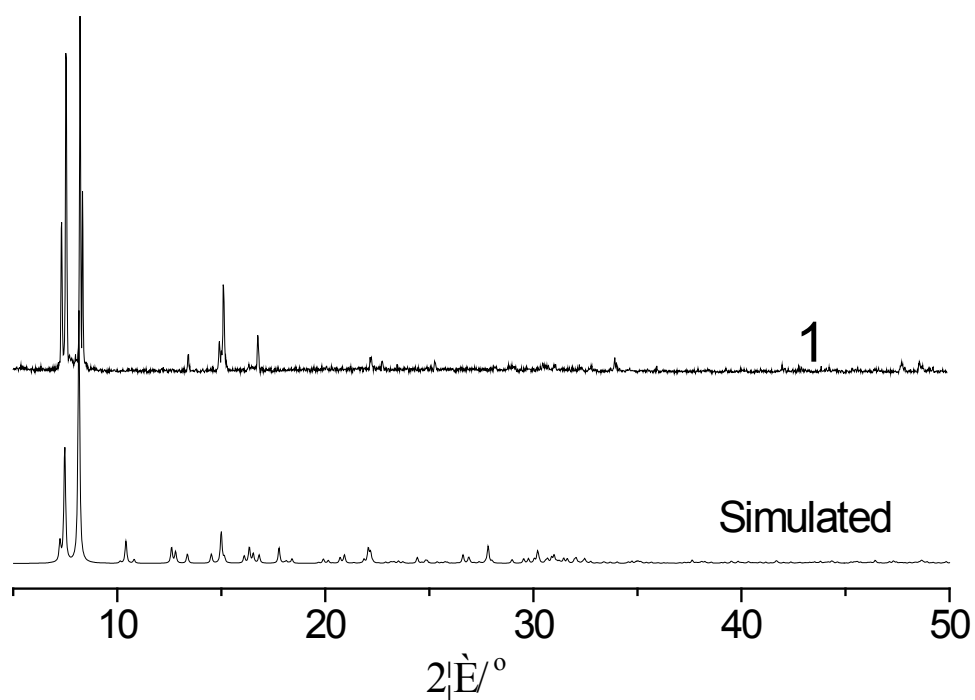

Fig. S4 Simulated and experimental powder XRD patterns of **1**.
